# Supplementary material for: MnO/TiO2/C/N-CNTs derived from Mn-doped Ti MOFs for simultaneous detection of catechol and hydroquinone
Source: Royal Society of Chemistry journal article supplement (doi:10.1039/d4ay01217h), 2024-01-01
Supplement: d4ay01217h1.pdf [file d4ay01217h1.pdf]

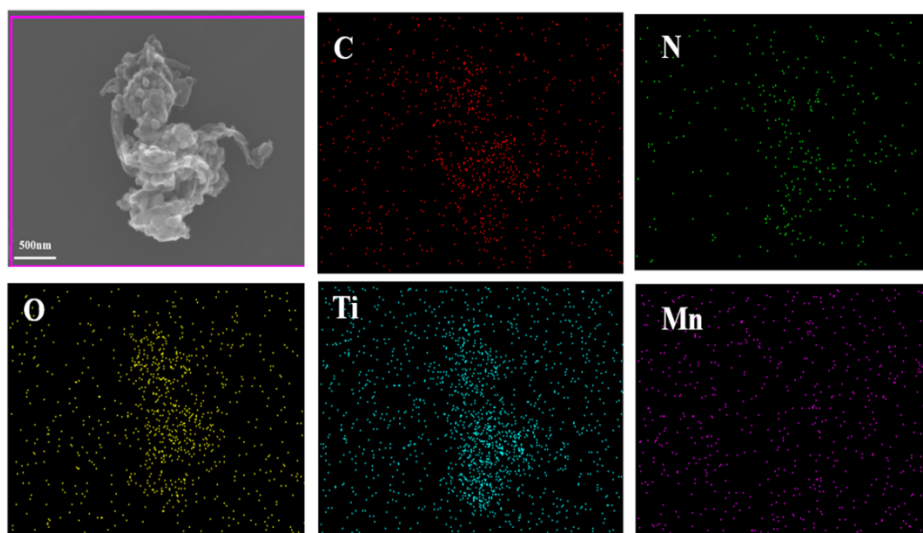

Fig. S1 Elemental mapping image of MnO/TiO<sub>2</sub>/C/N-CNTs.

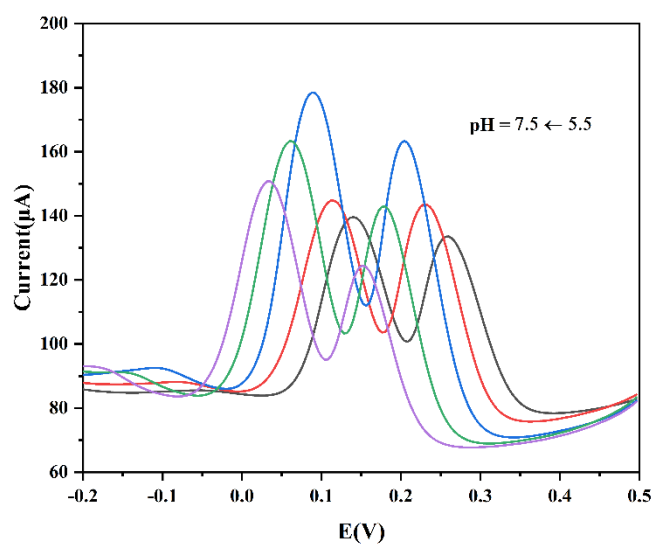

Fig. S2 The changes of oxidation peak current and potential of CC and HQ at different pH values

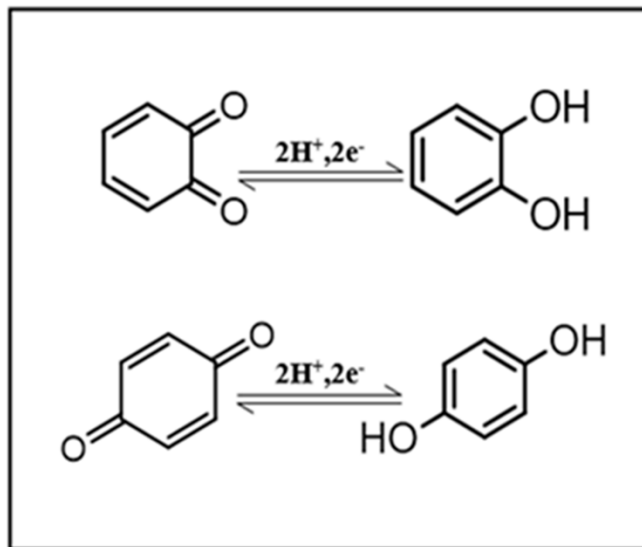

**Fig. S3** Principles of CC and HQ reactions at MnO/TiO<sub>2</sub>/C/N-CNTs/GCE surface.

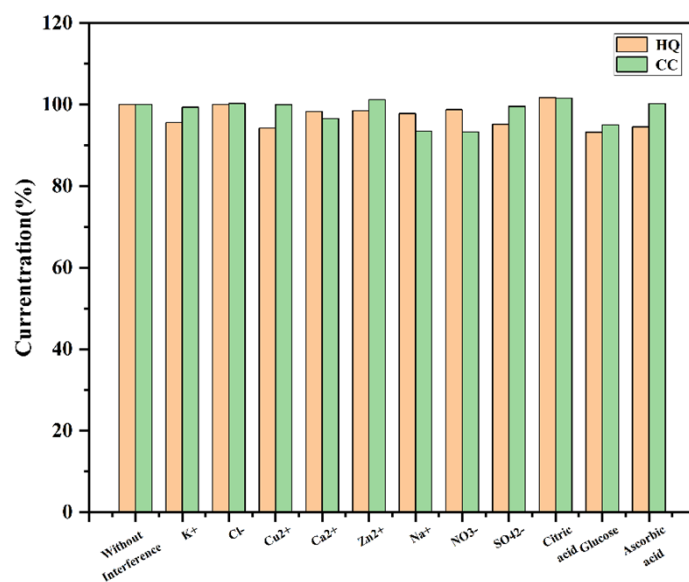

**Fig. S4** Effects of different interfering substances on the detection of CC and HQ at MnO/TiO<sub>2</sub>/C/N-CNTs/GCE.

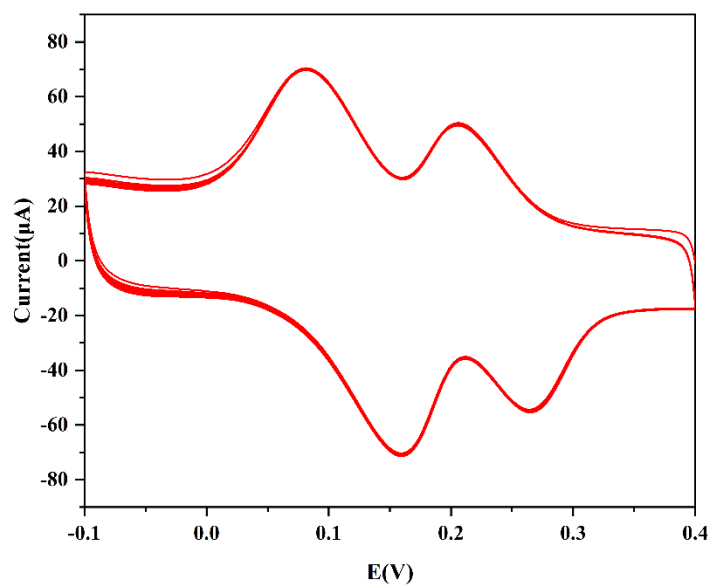

**Fig. S5** CV curves of MnO/TiO<sub>2</sub>/C/N-CNTs/GCE were scanned in 0.1 M PBS containing 50 μM CC and 50 μM HQ for 50 consecutive cycles.

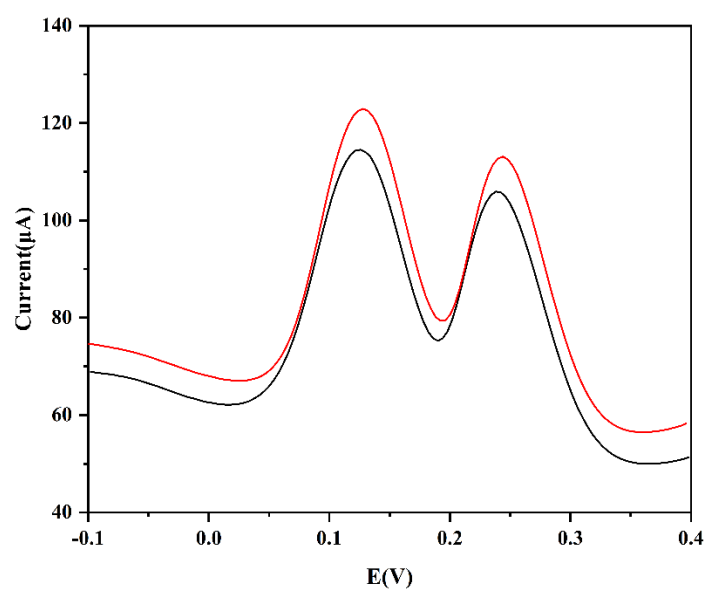

**Fig. S6** DPV curves of CC and HQ at the MnO/TiO<sub>2</sub>/C/N-CNTs/GCE before and after 7 days of storage at 4 °C in a refrigerator.

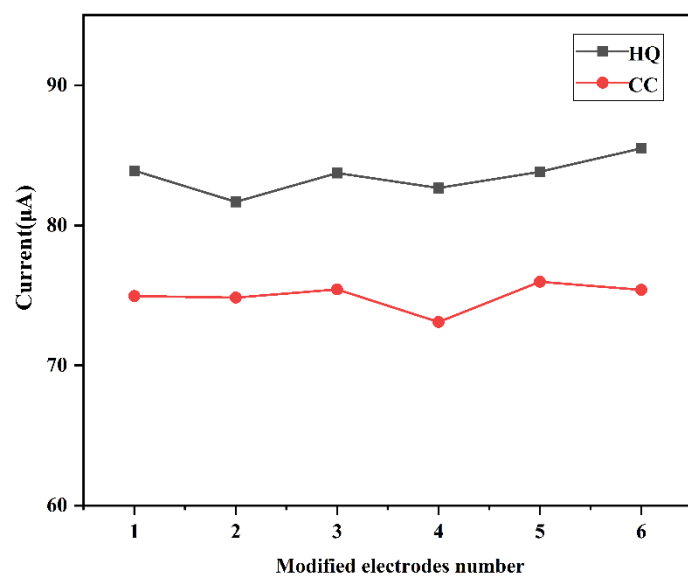

Fig. S7 DPV response currents of the six modified electrodes to CC and HQ.
