# Supplementary material for: MnO/TiO2/C/N-CNTs derived from Mn-doped Ti MOFs for simultaneous detection of catechol and hydroquinone
Source: Royal Society of Chemistry journal article supplement (doi:10.1039/d4ay01217h), 2024-01-01
Supplement: d4ay01217h2.pdf [file d4ay01217h2.pdf]

## Reagents and apparatus

Iron chloride hexahydrate ( $\text{FeCl}_3 \cdot 6\text{H}_2\text{O}$ , 99%), pyrrole, titanium butoxide (TBOT, 99%), terephthalic acid ( $\text{H}_2\text{BDC}$ , 99%), methyl orange (MO), Sodium dihydrogen phosphate ( $\text{NaH}_2\text{PO}_4 \cdot 2\text{H}_2\text{O}$ , AR) and disodium phosphate dodecahydrate ( $\text{Na}_2\text{HPO}_4 \cdot 12\text{H}_2\text{O}$ , 99%) were purchased from Aladdin Chemical Reagent Co., Ltd. Manganese acetate tetrahydrate ( $\text{Mn}(\text{COO})_2 \cdot 4\text{H}_2\text{O}$ , 99%) was purchased from Jinshan Xingtar Chemical Factory. (Shanghai, China).

SEM images were obtained on JEOL JSM-7610F Plus (Japan); the powder XRD spectra and XPS spectra were recorded by D8 advances X-ray diffractometer (Bruker, Germany); the FTIR spectra of the powder were tested by VERTEX 70 spectrum FTIR instrument (Bruker, Germany). Electrochemical tests were performed on CHI 660E electrochemical workstation (CHI Instruments, Shanghai, China). The electrochemical system consists of a working electrode (glass carbon electrode, GCE), a reference electrode (saturated calomel electrode) and a counter electrode (platinum electrode).

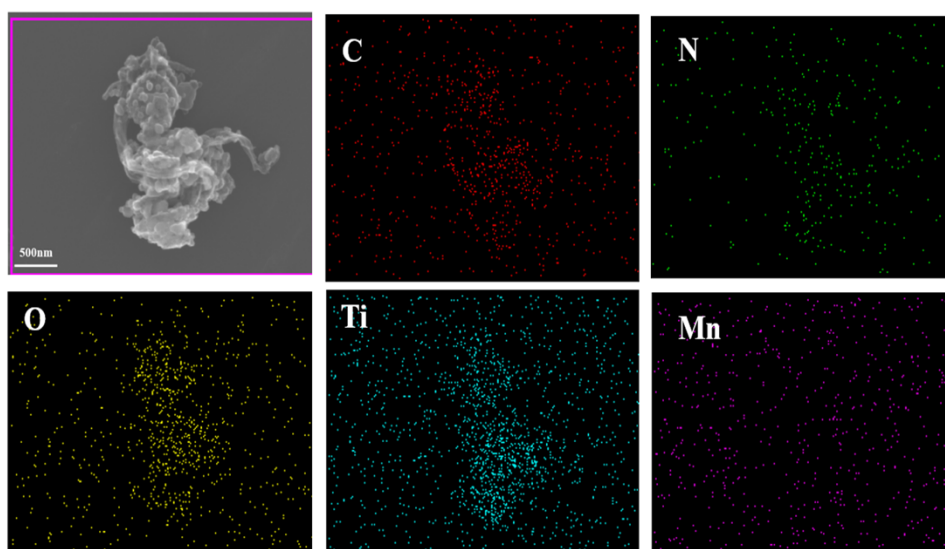

**Fig. S1** Elemental mapping image of  $\text{MnO}/\text{TiO}_2/\text{C}/\text{N}$ -CNTs.

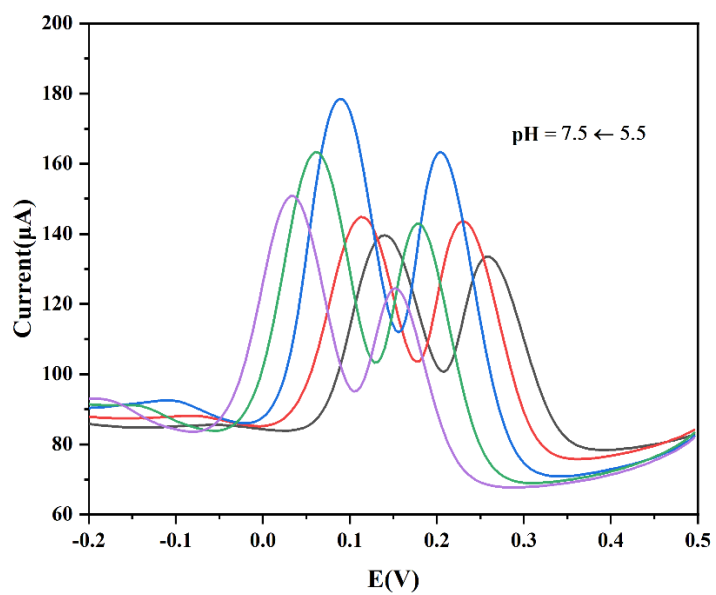

**Fig. S2** The changes of oxidation peak current and potential of CC and HQ at different pH values

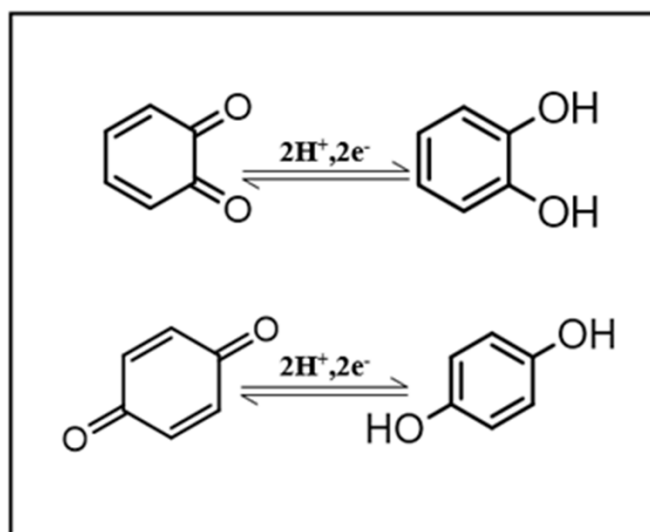

**Fig. S3** Principles of CC and HQ reactions at MnO/TiO<sub>2</sub>/C/N-CNTs/GCE surface.

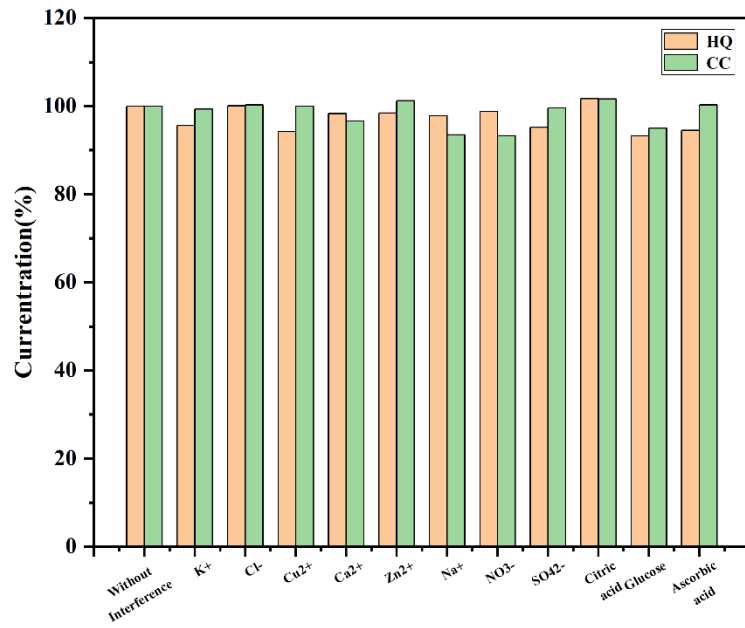

**Fig. S4** Effects of different interfering substances on the detection of CC and HQ at MnO/TiO<sub>2</sub>/C/N-CNTs/GCE.

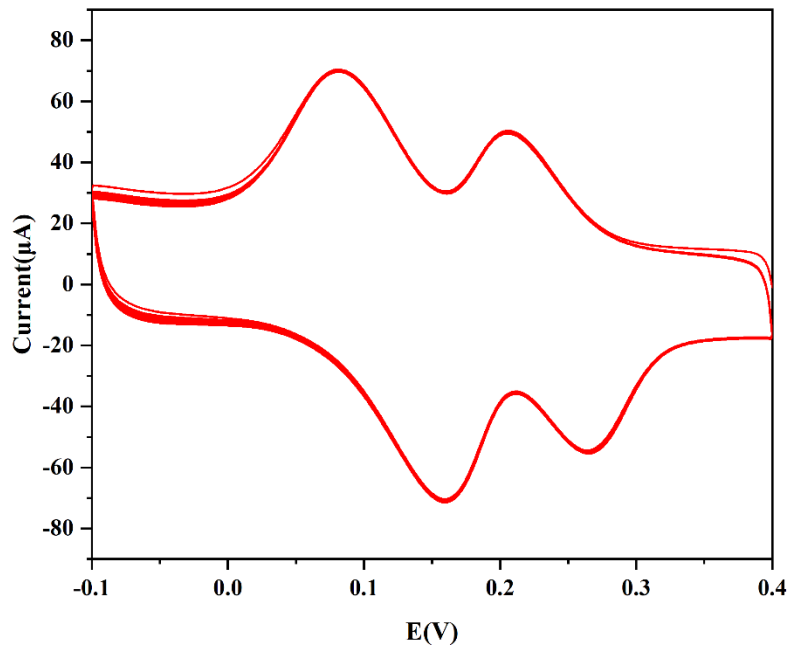

**Fig. S5** CV curves of MnO/TiO<sub>2</sub>/C/N-CNTs/GCE were scanned in 0.1 M PBS containing 50 µM CC and 50 µM HQ for 50 consecutive cycles.

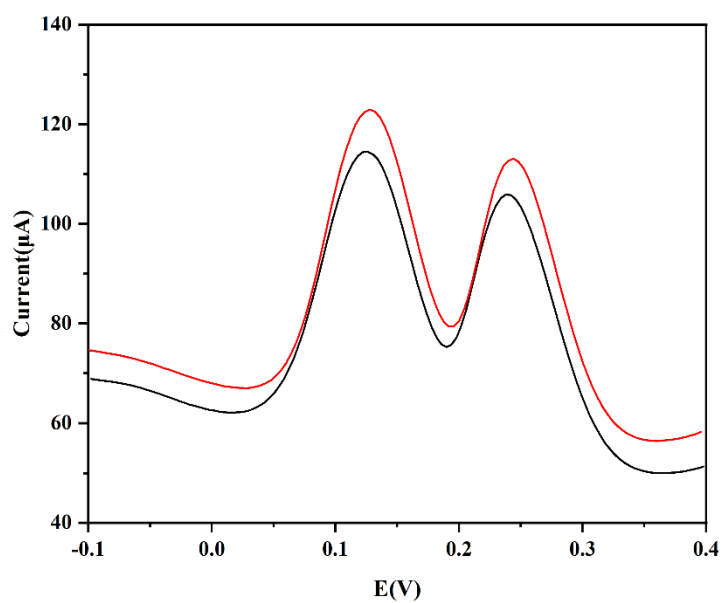

**Fig. S6** DPV curves of CC and HQ at the MnO/TiO<sub>2</sub>/C/N-CNTs/GCE before and after 7 days of storage at 4 °C in a refrigerator.

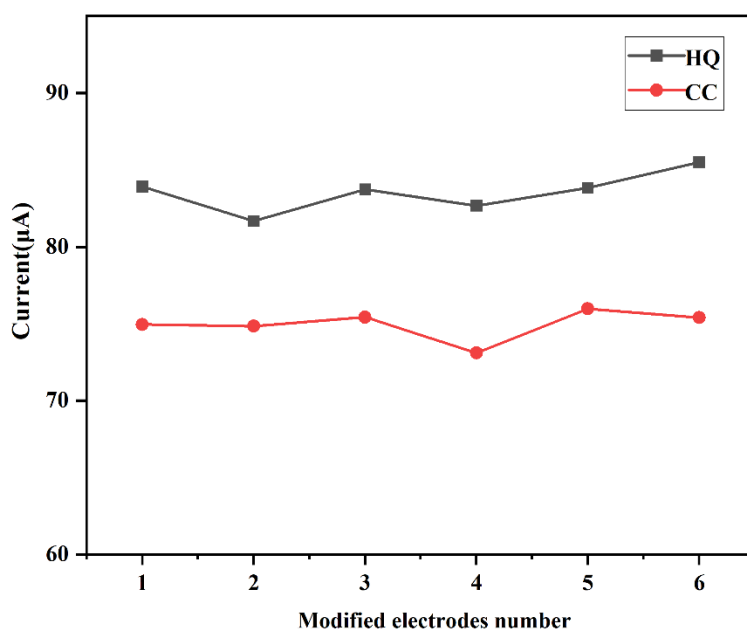

**Fig. S7** DPV response currents of the six modified electrodes to CC and HQ.
